# Supplementary material
Source: PubMed Central journal article supplement (PMC2741248)
Supplement: 0907360106_0907360106SI.pdf [file 0907360106_0907360106SI.pdf]

# cSupporting Information

Qiang, et al. 10.1073/pnas.0907360106

## SI Text

### Synthesis of 5-<sup>19</sup>F-DPPC

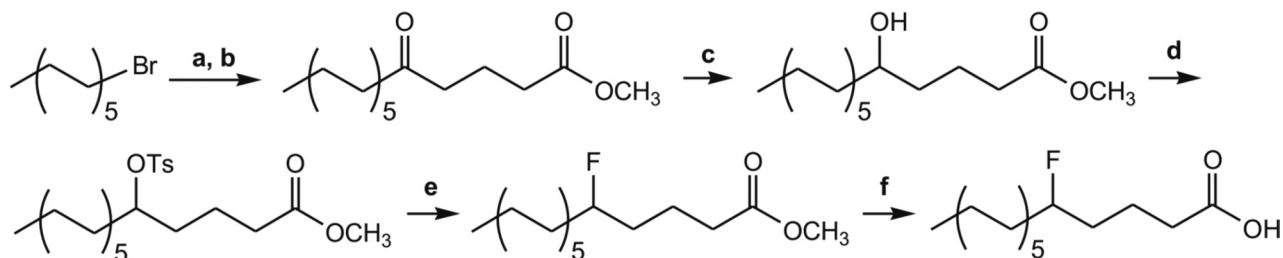

Scheme 1. Synthesis of 5-<sup>19</sup>F-palmitic acid.

**Scheme S1** summarizes the synthesis of 5-<sup>19</sup>F-palmitic acid which was used to make 1-palmitoyl-2-(5-fluoropalmitoyl)-*sn*-glycero-3-phosphocholine (5-<sup>19</sup>F-DPPC) (1–5). The overall yield of 5-<sup>19</sup>F-palmitic acid was  $\approx 40\%$  and each step was monitored by using thin layer chromatography with iodine and phosphomolybdic acid as visualization reagents. The intermediate products were purified by using silica gel column chromatography with a mixture of pentane and ethyl acetate as developing solutions. The 5-<sup>19</sup>F-DPPC was synthesized by Avanti Polar Lipids.

Reaction conditions in Scheme S1 included: (i) 68.2 g of undecyl bromide in 350 mL of dry diethyl ether was added to 6.94 g Mg in 100 mL of dry diethyl ether. Reflux at 34 °C for 2 h. (ii) The diethyl ether was removed and 28.0 g of methyl 4-(chloroformyl)butyrate in 100 mL of dry benzene was added to the Grignard solution from step a and 27.5 g of CdCl<sub>2</sub> in 350 mL of dry benzene. Reflux at 78 °C for 1 h. (iii) NaBH<sub>4</sub>, NaH<sub>2</sub>PO<sub>4</sub> and 5-keto-methyl palmitate each at 1 M concentration were dissolved in dry methanol. The mixture was stirred at 0 °C for 15 min and at ambient temperature for 1 h. (iv) 5-hydroxy-methyl palmitate and 0.5 M tosyl chloride each at 0.5 M concentration were dissolved in dry CH<sub>2</sub>Cl<sub>2</sub> with 0.025 M 4-(dimethylamino)pyridine. The mixture was cooled and held at 0 °C, dry pyridine was added dropwise >40 min to reach a final concentration 0.5 M, and then the mixture was stirred at 0 °C for 2 h. (v) 0.05 M 5-O-tosyl-methyl palmitate and 0.1 M tetrabutylammonium fluoride in dry CH<sub>3</sub>CN were stirred at ambient temperature for 96 h. (vi) 5-F-methyl palmitate and KOH powder were each added into dry methanol at 0 °C to reach a final concentration of 0.1 M of each reagent. The mixture was stirred at 0 °C for 2 h.

**Sample Preparation.** HFPmn and HFPmn\_mut were synthesized manually by using Fmoc chemistry. HFPtr was synthesized by using a Cys cross-linking reaction between monomer and dimer building blocks (6). In Table 1, the residues that are C-terminal of Ser-23 are nonnative and act as 280 nm chromophores for HFP quantitation (W), improve aqueous solubility (K), or are used for cross-linking (K and C). The line between K and C denotes a peptide bond between the Cys carbonyl and the Lys  $\epsilon$ -NH and a line between two Cs denotes a disulfide bond. All peptides were purified by using reverse-phase HPLC with a H<sub>2</sub>O-CH<sub>3</sub>CN gradient containing 0.1% TFA and identified with MALDI-TOF mass spectrometry. Membrane preparation began with dissolution in chloroform of a mixture of 16  $\mu$ mol DTPC, 4  $\mu$ mol DTPG, 2  $\mu$ mol 16-<sup>19</sup>F-DPPC (purchased from Avanti Polar Lipids) or 5-<sup>19</sup>F-DPPC, and 10  $\mu$ mol cholesterol. The chloroform was removed under a stream of nitrogen followed by overnight vacuum pumping. The lipid film was suspended in 2 mL of 5 mM *N*-(2-hydroxy-ethyl)piperazine-*N'*-2-ethanesulfonic acid (Hepes) buffer with pH = 7.0 and 0.01% NaN<sub>3</sub> and homogenized with 10 freeze-thaw cycles. Large unilamellar vesicles were formed by extrusion through a polycarbonate filter with 100-nm diameter pores (Avestin). HFPmn or HFPmn\_mut (0.8  $\mu$ mol) or HFPtr (0.27  $\mu$ mol) (as determined by using  $\epsilon_{280} = 5700 \text{ cm}^{-1} \text{ M}^{-1}$  for HFPmn\_mut and HFPmn or  $\epsilon_{280} = 17100 \text{ cm}^{-1} \text{ M}^{-1}$  for HFPtr) was dissolved in 2 mL of Hepes buffer, and the HFP and vesicle solutions were then gently vortexed together overnight. The mixture was ultracentrifuged at  $\approx 150,000 \times g$  for 5 h. The membrane pellet with associated bound HFP was transferred to a 4-mm diameter NMR rotor. Unbound HFP does not pellet under similar conditions (7).

**Solid-State NMR Spectroscopy.** Experiments were conducted on a 9.4 T solid-state NMR spectrometer (Varian Infinity Plus) with a quadruple-resonance magic angle spinning (MAS) probe equipped for 4-mm diameter rotors and tuned to <sup>1</sup>H, <sup>13</sup>C, <sup>31</sup>P, and <sup>19</sup>F nuclei. The <sup>13</sup>C shifts were externally referenced to the methylene resonance of adamantane at 40.5 ppm. The REDOR experiments were done by using a pulse sequence in which the dephasing period had one <sup>13</sup>C  $\pi$  pulse per rotor cycle for the *S*<sub>0</sub> and *S*<sub>1</sub> acquisitions and one <sup>31</sup>P or <sup>19</sup>F  $\pi$  pulse per rotor cycle for the *S*<sub>1</sub> acquisition (8). The dephasing period of the *S*<sub>0</sub> acquisition did not contain the <sup>31</sup>P or <sup>19</sup>F  $\pi$  pulses. Experimental parameters included: 8.0 kHz MAS frequency; 50 kHz <sup>1</sup>H  $\pi/2$  pulse; 50 kHz <sup>1</sup>H and 55–66 kHz ramped <sup>13</sup>C fields during 1-ms cross polarization; 50 kHz <sup>13</sup>C and 50 kHz <sup>31</sup>P or 33 kHz <sup>19</sup>F  $\pi$  pulses during the dephasing period; 95 kHz <sup>1</sup>H decoupling during the dephasing and acquisition periods; and 1-s recycle delay. Most of the setup of the NMR experiments was the same as described in earlier studies and included calibration of the <sup>1</sup>H, <sup>13</sup>C, and <sup>31</sup>P rf fields (6, 8). Nitrogen gas cooled to –50 °C was flowed over the sample to enhance signal-to-noise but this sample cooling does not affect HFP conformation (9). There is also no phase transition of the cholesterol-rich membranes between ambient and low temperature (10).

After acquisition of the REDOR NMR data, a 1 ppm region around the peak chemical shift of each *S*<sub>0</sub> and *S*<sub>1</sub> spectrum was integrated, and the integration values were denoted as *S*<sub>0</sub><sup>exp</sup> and *S*<sub>1</sub><sup>exp</sup>. The experimental normalized dephasing ( $\Delta S/S_0$ )<sup>exp</sup> = (*S*<sub>0</sub><sup>exp</sup> – *S*<sub>1</sub><sup>exp</sup>)/*S*<sub>0</sub><sup>exp</sup>.

The  $^{13}\text{CO}$ - $^{19}\text{F}$  experiments were validated by using a lyophilized sample containing helical peptide F whose sequence EQLLKALEFLLKELLEKL was modified by substitution of Phe-9 with *p*-fluorophenylalanine (11). A  $^{13}\text{CO}$  label was placed at Leu-10 and the REDOR-determined  $^{13}\text{CO}$ - $^{19}\text{F}$  distance was 7.8 Å and correlated with the 7.1-Å distance between the Leu-10 carbonyl carbon and the Phe-9 aromatic C4 carbon in the crystal structure of nonfluorinated peptide F.

**Effect of mol Fraction Fluorinated Lipid on  $(\Delta S/S_0)^{exp}$ .** A 100% 16- $^{19}\text{F}$ -DPPC lipid sample forms a nonbilayer structure (12). To maintain bilayer structure in the NMR samples, the membrane composition was 16 μmol DTPC, 4 μmol DTPG, 10 μmol cholesterol, and 2 μmol  $^{19}\text{F}$ -DPPC. This 0.09 lipid mol fraction of  $^{19}\text{F}$ -DPPC was initially determined with measurements on a series of samples which differed in their mol fraction of 5- $^{19}\text{F}$ -DPPC (Fig. S1). The choice of 0.09 mol fraction  $^{19}\text{F}$ -DPPC for subsequent samples was based on: (i) maximum  $^{13}\text{CO}$ - $^{19}\text{F}$   $(\Delta S/S_0)^{exp}$ ; and (ii) relatively constant  $(\Delta S/S_0)^{exp}$  over the 0.07–0.14 mol fraction range. Static  $^{31}\text{P}$  NMR spectra were consistent with overall bilayer structure in samples containing 0.09 mol fraction 5- $^{19}\text{F}$ -DPPC and HFPs (13).

**Calculation of  $(\Delta S/S_0)^{lab}$ .** Removal of the natural abundance  $^{13}\text{CO}$  contribution to  $(\Delta S/S_0)^{exp}$  resulted in  $(\Delta S/S_0)^{lab}$  which reflected the labeled  $^{13}\text{CO}$  contribution to the experimental data. The experimental  $^{13}\text{CO}$  signals have three contributions: (1) labeled  $^{13}\text{CO}$ s; (2) natural abundance HFP  $^{13}\text{CO}$ s; and (3) natural abundance  $^{13}\text{CO}$ s of the  $^{19}\text{F}$ -DPPC lipid. In each sample, the labeled  $S_0$   $^{13}\text{CO}$  contribution is assigned a value of 1, the fractional  $^{13}\text{C}$  natural abundance is 0.011, the ratio of unlabeled to labeled HFP residues is  $\approx 29$ , and the  $^{19}\text{F}$ -DPPC:HFP strand mol ratio is  $\approx 2.5$  with two COs per  $^{19}\text{F}$ -DPPC.

$$S_0^{exp} = S_0^{lab} + S_0^{na}(\text{HFP}) + S_0^{na}(\text{DPPC}) = 1 + (29 \times 0.011) + (2.5 \times 2 \times 0.011) = 1.374 \quad [\text{S1}]$$

$$S_1^{exp} = S_1^{lab} + S_1^{na}(\text{HFP}) + S_1^{na}(\text{DPPC}) \quad [\text{S2}]$$

$$S_1^{na}(\text{HFP}) = S_0^{na}(\text{HFP}) \times g^{na}(\text{HFP}) \quad [\text{S3a}]$$

$$S_1^{na}(\text{DPPC}) = S_0^{na}(\text{DPPC}) \times g^{na}(\text{DPPC}) \quad [\text{S3b}]$$

Calculation of the  $g^{na}(\text{HFP})$  and  $g^{na}(\text{DPPC})$  are discussed in the next paragraph. Algebraic manipulation of Eqs. S1–S3 yields:

$$\left(\frac{\Delta S}{S_0}\right)^{exp} = \frac{S_0^{exp} - S_1^{exp}}{S_0^{exp}} = \frac{1.374 - S_1^{lab} - [0.319 \times g^{na}(\text{HFP})] - [0.055 \times g^{na}(\text{DPPC})]}{1.374} \quad [\text{S4}]$$

$$\left(\frac{\Delta S}{S_0}\right)^{lab} = \frac{S_0^{lab} - S_1^{lab}}{S_0^{lab}} = \left[1.374 \times \left(\frac{\Delta S}{S_0}\right)^{exp}\right] + [0.319 \times g^{na}(\text{HFP})] + [0.055 \times g^{na}(\text{DPPC})] - 0.374 \quad [\text{S5}]$$

The  $g^{na}(\text{HFP})$  for each construct, dephasing time  $\tau$ , and lipid nucleus type, i.e.,  $^{31}\text{P}$ , 16- $^{19}\text{F}$ , or 5- $^{19}\text{F}$ , was approximated as the average of the  $(S_1/S_0)^{exp}$  of all samples with these same parameters. This approximation considers that the HFP  $^{13}\text{CO}$ s contribute  $\approx 96\%$  of the  $S_0$  signal (Eq. S1) and assumes that the distribution of membrane locations of the labeled  $^{13}\text{CO}$  sites is reflective of the average membrane location of the HFP. The  $g^{na}(\text{DPPC})$  for each  $\tau$  and lipid nucleus type was approximated as the  $(S_1/S_0)^{sim}$  value of a single  $^{13}\text{CO}$ - $^{31}\text{P}$  or  $^{13}\text{CO}$ - $^{19}\text{F}$  spin pair with details of the  $(S_1/S_0)^{sim}$  calculations given in the next section. The  $(S_1/S_0)^{sim}$  depends on internuclear distance and the  $^{13}\text{CO}$ - $^{31}\text{P}$  distance was set to 5.6 Å which is the experimentally derived average (lipid  $^{13}\text{CO}$ )- $^{31}\text{P}$  distance in a sample containing DPPC lipid and unlabeled HFPmn (8). The  $^{13}\text{CO}$ -(16- $^{19}\text{F}$ ) and  $^{13}\text{CO}$ -(5- $^{19}\text{F}$ ) distances were 5.6 Å and 15.2 Å, respectively, and were derived from a computational structure of gel phase DPPC (14). The  $g^{na}(\text{HFP})$  and  $g^{na}(\text{DPPC})$  are presented in Table S2 and Table S3.

**Fitting of  $(\Delta S/S_0)^{lab}$ .** For samples with significant nonzero  $(\Delta S/S_0)^{lab}$ , fitting was done with a model of two types of  $^{13}\text{CO}$ - $^{31}\text{P}$  or  $^{13}\text{CO}$ - $^{19}\text{F}$  spin pairs. One type had fractional population  $f$  and the other had population  $1 - f$ . The magnitude of dipolar coupling  $d$  was fitted for the  $f$  population and was set to 0 for the  $1 - f$  population. The  $1 - f$  population was included because many of the samples had  $(\Delta S/S_0)^{lab} < 1$  at large  $\tau$ . The  $(\Delta S/S_0)^{lab}$  were compared with:

$$\left[\left(\frac{\Delta S}{S_0}\right)(d, \tau)\right]^{sim} = \left\{1 - [J_0(\sqrt{2}d\tau)]^2 + \left[2 \times \sum_{k=1}^5 \frac{[J_k(\sqrt{2}d\tau)]^2}{16k^2 - 1}\right]\right\} \quad [\text{S6}]$$

using:

$$\chi^2(d, f) = \sum_{i=1}^T \frac{\left\{\left(\frac{\Delta S}{S_0}\right)_i^{lab} - \left[f \times \left(\frac{\Delta S}{S_0}\right)_i^{sim}\right]\right\}^2}{(\sigma_i^{lab})^2} \quad [\text{S7}]$$

where  $J_k$  is the  $k$ th order Bessel function of the first kind, each  $i$  corresponds to a particular value of  $\tau$ ,  $T$  is the number of REDOR data points, and  $\sigma_i^{lab}$  is the uncertainty of  $(\Delta S/S_0)^{lab}$  (15). The fitting parameters in Eq. S7 are  $d$  and  $f$ . Using Eq. S5, the  $\sigma_i^{lab}$  is calculated from  $\sigma_i^{exp}$ , the uncertainty in  $(\Delta S/S_0)^{exp}$ :

$$\sigma_i^{exp} = \frac{\sqrt{S_0^2 \sigma_{S_1}^2 + S_1^2 \sigma_{S_0}^2}}{S_0^2} \quad [\text{S8}]$$

$$\sigma_i^{lab} = 1.374 \times \sigma_i^{exp} \quad [\text{S9}]$$

where  $\sigma_{S_0}$  and  $\sigma_{S_1}$  were the experimental root-mean-square deviations of integrated intensities  $>1$  ppm in 12 different noise regions in the  $S_0$  and  $S_1$  spectra (16). The parameter  $d$  in Hz can be converted to the internuclear distance  $r$  in Å of a single  $^{13}\text{CO}-^{31}\text{P}$  or  $^{13}\text{CO}-^{19}\text{F}$  spin pair (17):

$$d = 12250/r^3 \quad ({}^{13}\text{CO}-^{31}\text{P} \text{ data}) \quad [\text{S10a}]$$

$$d = 28540/r^3 \quad ({}^{13}\text{CO}-^{19}\text{F} \text{ data}) \quad [\text{S10b}]$$

Example plots of  $(\Delta S/S_0)^{\text{lab}}$  and best-fit  $(\Delta S/S_0)^{\text{sim}}$  vs.  $\tau$  are shown in Fig. S2 and best-fit parameters are given in Table S4.

Fig. S3 shows  $^{13}\text{CO}-^{31}\text{P}$  spectra for a sample containing HFPmn-A21 and  $^{13}\text{CO}-(5-^{19}\text{F})$  spectra for a sample containing HFPmn-L9. The large  $(\Delta S/S_0)^{\text{exp}}$  in Fig. S3a indicates that the C terminus of HFPmn has close contact with  $^{31}\text{P}$ . This conclusion was further supported by fitting of  $(\Delta S/S_0)^{\text{lab}}$  to  $(\Delta S/S_0)^{\text{sim}}$ , Fig. S4, and may be due to Arg-22 and lysine side chains which have positive charges and which are attracted to the negatively charged phosphate groups. The full width at half maximum for the HFPmn-A21  $^{13}\text{CO}$  signal is  $\approx 8$  ppm, whereas the typical linewidth for residues in the Ala-1 to Ala-14 region is 3–5 ppm (Fig. 1) which probably means that the C-terminal region of HFP is less structured than the N-terminal region. In Fig. S3b, the  $^{13}\text{CO}-(5-^{19}\text{F})$   $(\Delta S/S_0)^{\text{exp}} \approx 0.3$  and should be compared with Fig. 2, which shows that for another sample containing HFPmn-L9,  $(\Delta S/S_0)^{\text{exp}} \approx 0$  for the  $^{13}\text{CO}-^{31}\text{P}$  and  $^{13}\text{CO}-(16-^{19}\text{F})$  data. Together with the spectra and dephasing curves shown in Fig. 5, the data support insertion of HFPmn into a single membrane leaflet (Fig. 3B).

- Birdsall NJ, Lee AG, Levine YK, Metcalfe JC (1971)  $^{19}\text{F}$  NMR of monofluorostearic acids in lecithin vesicles. *Biochim Biophys Acta* 241:693–696.
- McDonough B, Macdonald PM, Sykes BD, McElhaney RN (1983) Fluorine-19 nuclear magnetic resonance studies of lipid fatty acyl chain order and dynamics in Acholeplasma laidlawii B membranes. A physical, biochemical, and biological evaluation of monofluoropalmitic acids as membrane probes. *Biochemistry* 22:5097–5103.
- Sibi, MP, Rutherford, D, Sharma, R (1994) A new electrophilic alaninol synthon. A general route to oxazolidinones of D or (R)-2-amino alcohols from L-serine. *J Chem Soc Perkin Trans 1*:1675–1678.
- Jackson RFW, Perez-Gonzalez M (2005) Synthesis of N-(tert-butoxycarbonyl)- $\beta$ -iodoalanine methyl ester: A useful building block in the synthesis of nonnatural  $\alpha$ -amino acids via palladium catalyzed cross coupling reactions. *Org Synth* 81:77–81.
- Lang LX, Jagoda E, Ma Y, Sassaman MB, Eckelman WC (2006) Synthesis and in vivo biodistribution of F-18 labeled 3-*cis*-, 3-*trans*-, 4-*cis*-, and 4-*trans*-fluorocyclohexane derivatives of WAY 100635. *Bioorg Med Chem* 14:3737–3748.
- Qiang W, Weliky DP (2009) HIV fusion peptide and its cross-linked oligomers: Efficient syntheses, significance of the trimer in fusion activity, correlation of  $\beta$  strand conformation with membrane cholesterol, and proximity to lipid headgroups. *Biochemistry* 48:289–301.
- Yang R, Prorok M, Castellino FJ, Weliky DP (2004) A trimeric HIV-1 fusion peptide construct which does not self-associate in aqueous solution and which has 15-fold higher membrane fusion rate. *J Am Chem Soc* 126:14722–14723.
- Qiang W, Yang J, Weliky DP (2007) Solid-state nuclear magnetic resonance measurements of HIV fusion peptide to lipid distances reveal the intimate contact of beta strand peptide with membranes and the proximity of the Ala-14-Gly-16 region with lipid headgroups. *Biochemistry* 46:4997–5008.
- Bodner ML, et al. (2004) Temperature dependence and resonance assignment of  $^{13}\text{C}$  NMR spectra of selectively and uniformly labeled fusion peptides associated with membranes. *Magn Reson Chem* 42:187–194.
- Bloom M, Evans E, Mouritsen OG (1991) Physical properties of the fluid lipid-bilayer component of cell membranes: A perspective. *Quart Rev Biophys* 24:293–397.
- Taylor KS, Lou MZ, Chin TM, Yang NC, Garavito RM (1996) A novel, multilayer structure of a helical peptide. *Protein Sci* 5:414–421.
- Hirsh DJ, et al. (1998) A new monofluorinated phosphatidylcholine forms interdigitated bilayers. *Biophys J* 75:1858–1868.
- Gabrys CM, et al. (2009) Nuclear magnetic resonance evidence for retention of a lamellar membrane phase with curvature in the presence of large amounts of the HIV fusion peptide. *Biochim Biophys Acta*, in press.
- Venable RM, Brooks BR, Pastor RW (2000) Molecular dynamics simulations of gel ( $L_{\beta}$ ) phase lipid bilayers in constant pressure and constant surface area ensembles. *J Chem Phys* 112:4822–4832.
- Mueller KT (1995) Analytical solutions for the time evolution of dipolar-dephasing NMR signals. *J Magn Reson Ser A* 113:81–93.
- Bevington, PR, Robinson, DK (1992) *Data Reduction and Error Analysis for the Physical Sciences* (McGraw-Hill, Boston).
- Schmidt-Rohr, K, Spiess, HW (1994) *Multidimensional Solid-State NMR and Polymers* (Academic, San Diego).

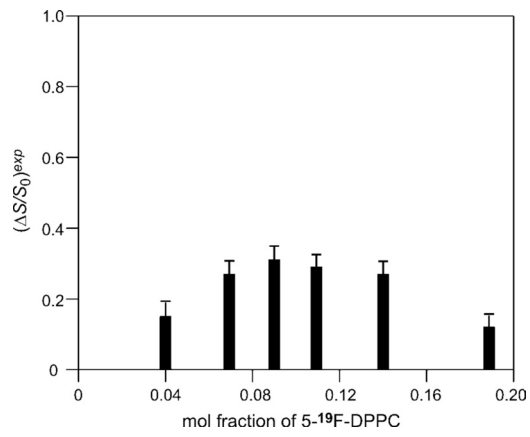

**Fig. S1.** Plot of <sup>13</sup>CO-<sup>19</sup>F  $(\Delta S/S_0)^{exp}$  vs. lipid mol fraction of 5-<sup>19</sup>F-DPPC at  $\tau = 16$  ms. All samples contained HFPmn-L9.

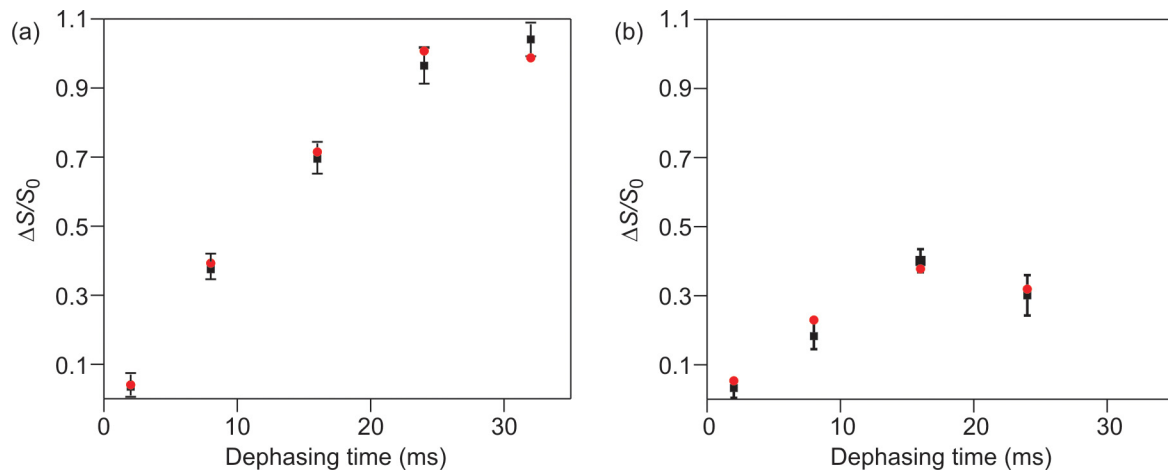

**Fig. S2.** Plots of  $(\Delta S/S_0)^{ab}$  (black squares with error bars) and best-fit  $(\Delta S/S_0)^{sim}$  (red circles) vs. dephasing time for the (a)  $^{13}\text{CO}-^{31}\text{P}$  data of the sample and the (b)  $^{13}\text{CO}-(5-^{19}\text{F})$  data of the HFPmn-A6 sample. The  $\chi^2_{min}$  for the best-fits were (a) 0.7 and (b) 0.5.

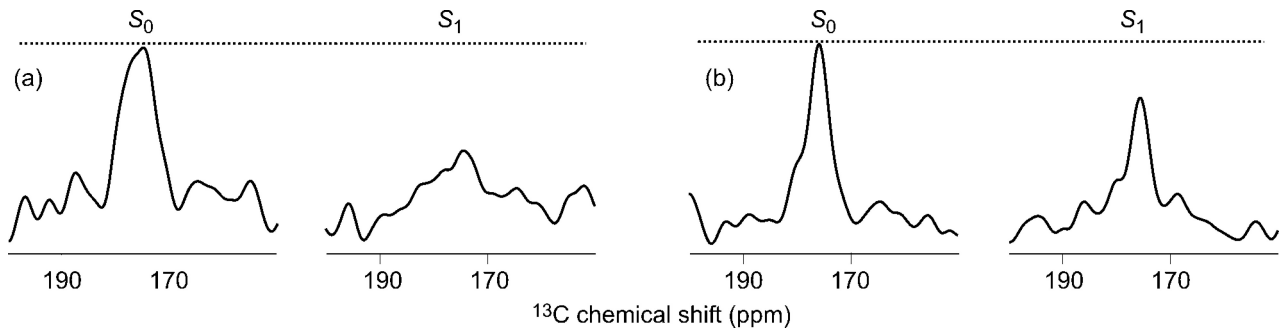

**Fig. S3.** (a)  $^{13}\text{C}$ - $^{31}\text{P}$   $S_0$  and  $S_1$  spectra of a sample containing HFPmn-A21 and (b)  $^{13}\text{C}$ -( $^5\text{F}$ - $^{19}\text{F}$ ) spectra of a sample containing HFPmn-L9. The dephasing time was (a) 32 ms or (b) 24 ms. All spectra were processed with 200 Hz Gaussian line broadening and polynomial baseline correction. Each spectrum was the sum of (a) 50,000 or (b) 20,000 scans.

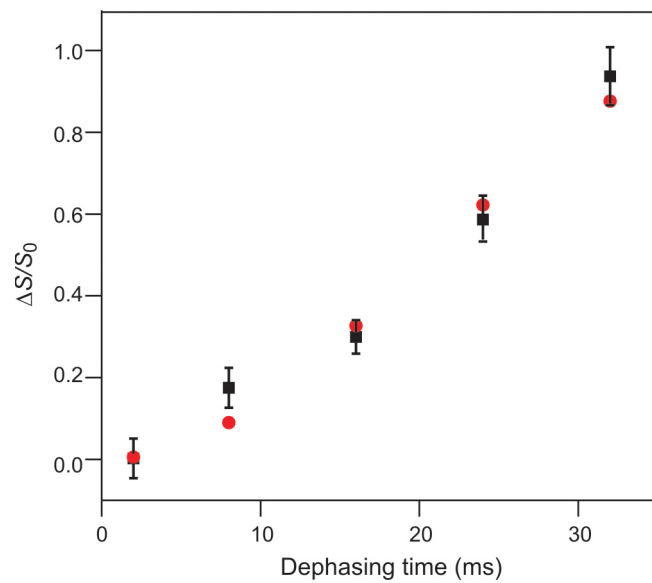

**Fig. S4.**  $^{13}\text{CO}$ - $^{31}\text{P}$  REDOR data and fitting for HFPmn-A21. For each  $\tau$ , the  $(\Delta S/S_0)^{ab}$  are represented by black squares with error bars and best-fit  $(\Delta S/S_0)^{sim}$  are represented by red circles. The best-fit  $r$ ,  $f$ , and  $\chi^2$  were 6.9 (2) Å, 0.98 (4), and 3.0, respectively.

**Table S1. Peak  $^{13}\text{C}$ O chemical shifts\*\*†**

| Construct | Labeled residue |       |       |       |       |       |       |
|-----------|-----------------|-------|-------|-------|-------|-------|-------|
|           | Ala1            | Ile4  | Ala6  | Leu9  | Leu12 | Ala14 | Ala21 |
| HFPmn_mut | 176.5           | 175.2 | 175.3 | 172.7 | 174.3 | 176.3 | 175.2 |
| HFPmn     | 174.3           | 174.5 | 175.3 | 173.0 | 173.7 | 176.5 | 174.7 |
| HFPtr     | 174.7           | 174.6 | 175.2 | 173.5 | 174.2 | 176.5 | —‡    |

\*The peak shift was measured in the  $^{13}\text{C}$ O- $^{31}\text{P}$   $S_0$  spectrum with  $\tau = 2$  ms. The signal from the labeled  $^{13}\text{C}$ O nucleus is  $\approx 75\%$  of the total  $^{13}\text{C}$ O signal intensity ([SI Text](#)).

†The distributions of database  $^{13}\text{C}$ O chemical shifts in  $\beta$  strand or helical conformation are: Ala,  $176.09 \pm 1.51$  or  $179.40 \pm 1.40$  ppm, respectively; Ile,  $174.86 \pm 1.39$  or  $177.72 \pm 1.29$  ppm; and Leu,  $175.65 \pm 1.47$  or  $178.53 \pm 1.30$  ppm [Zhang, HY, Neal, S, Wishart, DS (2003) RefDB: A database of uniformly referenced protein chemical shifts. *J Biomol NMR* 25:173–195].

‡HFPtr-A21 was not studied.



**Table S2. The  $g^{na}$  (HFP)**

| $\tau$ (ms) | $^{13}\text{CO-}^{31}\text{P}^*$ |       |       | $^{13}\text{CO-}(16\text{-}^{19}\text{F})^{*\dagger}$ | $^{13}\text{CO-}(5\text{-}^{19}\text{F})^{*\dagger}$ |
|-------------|----------------------------------|-------|-------|-------------------------------------------------------|------------------------------------------------------|
|             | HFPmn_mut                        | HFPmn | HFPtr | HFPtr                                                 | HFPmn                                                |
| 2           | 0.993                            | 0.977 | 0.990 | 0.982                                                 | 0.998                                                |
| 8           | 0.882                            | 0.867 | 0.901 | 0.996                                                 | 0.984                                                |
| 16          | 0.681                            | 0.740 | 0.812 | 0.972                                                 | 0.968                                                |
| 24          | 0.535                            | 0.647 | 0.706 | 0.865                                                 | 0.842                                                |
| 32          | 0.556                            | 0.620 | 0.692 | —                                                     | —                                                    |

\*The  $^{13}\text{CO-}^{31}\text{P}$  values were based on the  $(S_1/S_0)^{\text{exp}}$  of samples labeled at Ala1, Ile4, Ala6, Leu9, Leu12, or Ala14, and for HFPmn\_mut and HFPmn, Ala21. The  $^{13}\text{CO-}(16\text{-}^{19}\text{F})$  values were based on samples labeled at Ala1, Ile4, Ala6, Leu9, Leu12, or Ala14 and the  $^{13}\text{CO-}(5\text{-}^{19}\text{F})$  values were based on samples labeled at Ala1, Ala6, or Leu9.

†The maximum  $\tau$  for  $^{13}\text{CO-}^{19}\text{F}$  experiments was 24 ms.



Table S4. Best-fit distance and population parameters\*\*†

| <sup>13</sup> CO- <sup>31</sup> P      |              | Ala1     | Ile4     | Ala6     | Leu9     | Leu12    | Ala14    |
|----------------------------------------|--------------|----------|----------|----------|----------|----------|----------|
| HFPmn_mut                              | <i>r</i> (Å) | 5.2 (4)  | 5.5 (4)  | 5.0 (4)  | 5.2 (4)  | 5.7 (4)  | 6.3 (6)  |
|                                        | <i>f</i>     | 0.86 (8) | 0.45 (6) | 0.36 (4) | 0.33 (4) | 0.39 (4) | 0.75 (6) |
| HFPmn                                  | <i>r</i> (Å) | 4.8 (4)  | n.d.     | n.d.     | n.d.     | 8.6 (4)  | 5.7 (4)  |
|                                        | <i>f</i>     | 0.87 (5) |          |          |          | 0.70 (6) | 0.77 (5) |
| HFPtr                                  | <i>r</i> (Å) | 5.1 (4)  | 7.9 (4)  | n.d.     | n.d.     | 9.4 (2)  | 5.9 (4)  |
|                                        | <i>f</i>     | 0.83 (7) | 0.66 (6) |          |          | 0.63 (6) | 0.72 (6) |
| <sup>13</sup> CO-(16- <sup>19</sup> F) |              | Ala1     | Ile4     | Ala6     | Leu9     | Leu12    | Ala14    |
| HFPmn_mut                              | <i>r</i> (Å) | n.d.     | n.d.     | n.d.     | n.d.     | n.d.     | n.d.     |
|                                        | <i>f</i>     |          |          |          |          |          |          |
| HFPmn                                  | <i>r</i> (Å) | n.d.     | n.d.     | n.d.     | n.d.     | n.d.     | n.d.     |
|                                        | <i>f</i>     |          |          |          |          |          |          |
| HFPtr                                  | <i>r</i> (Å) | n.d.     | n.d.     | 8.1 (6)  | 6.9 (4)  | n.d.     | n.d.     |
|                                        | <i>f</i>     |          |          | 0.35 (4) | 0.39 (4) |          |          |
| <sup>13</sup> CO-(5- <sup>19</sup> F)  |              | Ala1     | Ile4     | Ala6     | Leu9     | Leu12    | Ala14    |
| HFPmn_mut                              | <i>r</i> (Å) | n.d.     | —        | n.d.     | —        | —        | —        |
|                                        | <i>f</i>     |          |          |          |          |          |          |
| HFPmn                                  | <i>r</i> (Å) | n.d.     | —        | 7.0 (4)  | 7.3 (4)  | —        | —        |
|                                        | <i>f</i>     |          |          | 0.37 (4) | 0.34 (4) |          |          |
| HFPtr                                  | <i>r</i> (Å) | n.d.     | —        | n.d.     | —        | —        | —        |
|                                        | <i>f</i>     |          |          |          |          |          |          |

\*Best-fit *d* and *f* were determined using Eq. S7 with typical  $\chi^2_{min} < 5$ . The uncertainties of *d* and *f* in parentheses were determined from the region encompassed by  $\chi^2 = \chi^2_{min} + 1$  (16). The best-fit *r* and associated uncertainty was calculated with either Eqs. S10a or S10b.

†n.d. means "not determined" and refers to samples with  $(\Delta S/S_0)^{exp} < 0.1$  at  $\tau = 32$  ms (<sup>13</sup>CO-<sup>31</sup>P) or at  $\tau = 24$  ms (<sup>13</sup>CO-<sup>19</sup>F), or to samples with no clear buildup curve.

‡A solid line means the experiment was not done.
